# Supplementary material for: Enhancing the magnetic performance of pyrazine-N-oxide bridged dysprosium chains through controlled variation of ligand coordination modes
Source: Royal Society of Chemistry journal article supplement (doi:10.1039/d1dt00635e), 2021-01-01
Supplement: d1dt00635e1.pdf [file d1dt00635e1.pdf]

# Supporting Information for

## Enhancing magnetic performance of pyrazine-N-oxide bridged dysprosium chains through controlled variation of ligand coordination modes

Xiao-Qin Ji,<sup>a</sup> Jin Xiong,<sup>c</sup> Rong Sun,<sup>c</sup> Fang Ma,<sup>a</sup> Hao-Ling Sun,<sup>\*a</sup> Yi-Quan Zhang,<sup>b</sup> and  
Song Gao<sup>\*c</sup>

<sup>a</sup> Department of Chemistry and Beijing Key Laboratory of Energy Conversion and Storage Materials, Beijing Normal University, Beijing 100875, P. R. China. E-mail: [haolingsun@bnu.edu.cn](mailto:haolingsun@bnu.edu.cn);

<sup>b</sup> Jiangsu Key Laboratory for NSLSCS, School of Physical Science and Technology, Nanjing Normal University, Nanjing 210023, P. R. China. E-mail: [zhangyiquan@njnu.edu.cn](mailto:zhangyiquan@njnu.edu.cn);

<sup>c</sup> Beijing National Laboratory for Molecular Sciences, State Key Laboratory of Rare Earth Materials Chemistry and Applications, College of Chemistry and Molecular Engineering, Peking University, Beijing 100871, China. E-mail: [gaosong@pku.edu.cn](mailto:gaosong@pku.edu.cn);

### Experimental Section

Elemental analyses of carbon, hydrogen, and nitrogen were carried out with an ElementarVario EL analyzer. FTIR spectra were recorded in the range of 4000 to 400 cm<sup>-1</sup> on an AVATAR 360 Nicolet 380 FT/IR spectrometer using KBr pellets. Powder X-ray diffraction (XRD) analyses were performed on a Rigaku Dmax-2000 X-ray diffractometer with Cu K $\alpha$  ( $\lambda=1.54059$  Å) radiation. Variable-temperature magnetic susceptibility measurements of **1** and **2** were performed on Quantum Design PPMS magnetometer (100~10000 Hz) and Quantum Design SQUID-MPMS3 (1~1000 Hz) magnetometer.

## Computational details

For complexes **1** and **2**, there are two or one types of Dy<sup>3+</sup> fragments, and thus we extracted two or one Dy<sup>3+</sup> fragments (see Fig. 14 for the model structure of the calculated Dy<sup>3+</sup> fragment) from **1** and **2** on the basis of single-crystal X-ray determined geometry. Complete-active-space self-consistent field (CASSCF) calculations on individual Dy<sup>3+</sup> fragment have been carried out with MOLCAS 8.2 program package.<sup>S1</sup> The basis sets for all atoms are atomic natural orbitals from the MOLCAS ANO-RCC library: ANO-RCC-VTZP for Dy<sup>3+</sup> ion; VTZ for close O and N; VDZ for distant atoms. During the calculation, the close Dy<sup>3+</sup> ion was replaced by diamagnetic Lu<sup>3+</sup>. The calculations employed the second order Douglas-Kroll-Hess Hamiltonian, where scalar relativistic contractions were taken into account in the basis set and the spin-orbit couplings were handled separately in the restricted active space state interaction (RASSI-SO) procedure. For the fragment of individual Dy<sup>3+</sup> ion, active electrons in 7 active spaces include all *f* electrons (CAS (9 in 7)) in the CASSCF calculation. To exclude all the doubts, we calculated all the roots in the active space. We have mixed the maximum number of spin-free state which was possible with our hardware (all from 21 sextets, 128 from 224 quadruplets, 130 from 490 doublets).

## Fitting the exchange interaction in two complexes using Lines model based on CASSCF results

To fit the exchange interactions in complexes **1** and **2**, we took two steps to obtain them. Firstly, we calculated the mononuclear fragment using CASSCF to obtain the corresponding magnetic properties (see the first part). And then, the exchange interaction between the magnetic centers is considered within the Lines model,<sup>S2</sup> while the account of the dipole-dipole magnetic coupling is treated exactly. The Lines model is effective and has been successfully used widely in the research field of binuclear lanthanide single-molecule magnets.<sup>S3</sup>

For complexes **1** and **2**, we only consider one type of Dy<sup>3+</sup>-Dy<sup>3+</sup> interactions. The exchange Hamiltonian can be expressed as follow:  $\hat{H}_{exch} = -J_{total} \hat{S}_{Dy1} \hat{S}_{Dy1A}$ .

The  $J_{total}$  is the parameter of the total magnetic interaction ( $J_{total}=J_{dipolar}+J_{exchange}$ )

between Dy<sup>3+</sup> ions. The  $\hat{S}_{Dy} = \pm 1/2$  is the ground pseudospin on the Dy<sup>3+</sup> site. The dipolar magnetic coupling can be calculated exactly, while the exchange coupling constant was fitted through comparison of the computed and measured magnetic susceptibility using the POLY\_ANISO program.<sup>S4</sup>

Table S1. Selected Bond Distances (Å) in complexes **1** and **2**

| <b>1-Dy1</b> |            | <b>1-Dy2</b> |           | <b>2</b> |          |
|--------------|------------|--------------|-----------|----------|----------|
| Dy1-O1       | 2.162(4)   | Dy2-O4       | 2.172(4)  | Dy1-O1   | 2.164(7) |
| Dy1-O2       | 2.351(3)   | Dy2-O2       | 2.384(4)  | Dy1-O2   | 2.356(7) |
| Dy1-O5       | 2.389(4)   | Dy2-O5       | 2.339(3)  | Dy1-O2#1 | 2.354(7) |
| Dy1-O6       | 2.361(4)   | Dy2-O7       | 2.446(4)  | Dy1-O3#2 | 2.401(7) |
| Dy1-O9#1     | 2.462(4)   | Dy2-O8       | 2.389(4)  | Dy1-O4   | 2.353(7) |
| Dy1-N1       | 2.507(5)   | Dy2-N5       | 2.438(5)  | Dy1-N1   | 2.501(8) |
| Dy1-N3       | 2.579(5)   | Dy2-N8       | 2.559(5)  | Dy1-N4#1 | 2.602(8) |
| Dy1-Cl1      | 2.744 (16) | Dy2-Cl2      | 2.729(17) | Dy1-Cl1  | 2.726(2) |

Symmetry code for **1**: #1: 1-x, -1/2+y, 1/2-zSymmetry code for **2**: #1: 1-x,2-y,1-zTable S2. Hydrogen Bonds in **1**.

| D-H     | d(D-H) (Å) | <DHA (°) | d(D...A) (Å) | A                      |
|---------|------------|----------|--------------|------------------------|
| C6-H6a  | 0.9300     | 153.72   | 3.706        | Cl2 [ 3-x, 1-y, 1-z ]  |
| C7-H7a  | 0.9301     | 161.05   | 3.624        | Cl2 [ 3-x, 1-y, 1-z ]  |
| C10-H10 | 0.9300     | 137.73   | 3.661        | Br1 [ 4-x, 1-y, 1-z ]  |
| C18-H18 | 0.9301     | 161.05   | 3.624        | Cl1 [ 1-x, -y, 1-z ]   |
| C18-H18 | 0.9301     | 149.38   | 3.713        | Cl2 [x, 0.5-y, 0.5+z ] |
| C24-H24 | 0.9299     | 137.87   | 3.123        | O3 [x, 0.5-y, 0.5+z ]  |

Table S3. Hydrogen Bonds in **2**.

| D-H     | d(D-H) (Å) | <DHA (°) | d(D...A) (Å) | A                      |
|---------|------------|----------|--------------|------------------------|
| C13-H13 | 0.930      | 171.00   | 3.670        | Cl1 [ -x, 2-y, 1-z ]   |
| C12-H12 | 0.930      | 130.09   | 3.503        | Cl1 [ -x, 2-y, 1-z ]   |
| C3-H3   | 0.930      | 146.44   | 3.838        | Br1 [ 1+x, -2+y, 1+z ] |

Table S4. Relaxation fitting parameters from Least-Squares Fitting of  $\chi(f)$  data under zero dc field of **1**.

| T (K) | $\chi_t$ | $\chi_s$ | $\alpha$ | $\tau$ (s) |
|-------|----------|----------|----------|------------|
| 5     | 7.49     | 0.090    | 0.26     | 0.60       |
| 5.5   | 6.32     | 0.086    | 0.25     | 0.35       |
| 6     | 5.56     | 0.082    | 0.24     | 0.21       |
| 6.5   | 4.89     | 0.079    | 0.24     | 0.13       |
| 7     | 4.40     | 0.078    | 0.23     | 0.088      |
| 7.5   | 4.02     | 0.075    | 0.22     | 0.061      |
| 8     | 3.70     | 0.074    | 0.22     | 0.043      |
| 8.5   | 3.44     | 0.072    | 0.21     | 0.031      |
| 9     | 3.23     | 0.072    | 0.21     | 0.023      |
| 9.5   | 3.04     | 0.071    | 0.21     | 0.018      |
| 10    | 2.87     | 0.070    | 0.21     | 0.014      |
| 10.5  | 2.72     | 0.072    | 0.20     | 0.011      |
| 11    | 2.59     | 0.071    | 0.20     | 0.0083     |
| 11.5  | 2.46     | 0.071    | 0.20     | 0.0066     |
| 12    | 2.36     | 0.068    | 0.20     | 0.0053     |
| 12.5  | 2.25     | 0.069    | 0.20     | 0.0042     |
| 13    | 2.15     | 0.069    | 0.19     | 0.0034     |
| 13.5  | 2.07     | 0.071    | 0.19     | 0.0028     |
| 14    | 1.99     | 0.067    | 0.19     | 0.0022     |
| 14.5  | 1.91     | 0.070    | 0.19     | 0.0018     |
| 15    | 1.84     | 0.064    | 0.19     | 0.0015     |
| 15.5  | 1.78     | 0.061    | 0.20     | 0.0012     |
| 16    | 1.72     | 0.055    | 0.20     | 9.57E-4    |
| 16.5  | 1.66     | 0.057    | 0.21     | 7.79E-4    |
| 17    | 1.61     | 0.057    | 0.21     | 6.33E-4    |
| 17.5  | 1.56     | 0.060    | 0.21     | 5.23E-4    |
| 18    | 1.52     | 0.048    | 0.22     | 4.25E-4    |
| 18.5  | 1.47     | 0.067    | 0.22     | 3.57E-4    |
| 19    | 1.40     | 0.11     | 0.19     | 3.06E-4    |
| 19.5  | 1.39     | 0.087    | 0.23     | 2.60E-4    |
| 20    | 1.30     | 0.12     | 0.17     | 2.08E-4    |
| 20.5  | 1.28     | 0.12     | 0.16     | 1.79E-4    |
| 21    | 1.24     | 0.10     | 0.20     | 1.44E-4    |
| 21.5  | 1.19     | 0.11     | 0.18     | 1.21E-4    |
| 22    | 1.14     | 0.11     | 0.18     | 1.00E-4    |
| 22.5  | 1.11     | 0.12     | 0.17     | 8.36E-5    |
| 23    | 1.08     | 0.13     | 0.16     | 7.00E-5    |
| 23.5  | 1.05     | 0.13     | 0.16     | 5.90E-5    |
| 24    | 1.03     | 0.15     | 0.15     | 5.04E-5    |

|      |      |      |       |         |
|------|------|------|-------|---------|
| 24.5 | 1.00 | 0.15 | 0.15  | 4.21E-5 |
| 25   | 0.98 | 0.18 | 0.13  | 3.72E-5 |
| 25.5 | 0.96 | 0.19 | 0.13  | 3.16E-5 |
| 26   | 0.93 | 0.20 | 0.12  | 2.73E-5 |
| 26.5 | 0.92 | 0.20 | 0.12  | 2.30E-5 |
| 27   | 0.89 | 0.23 | 0.097 | 2.06E-5 |
| 27.5 | 0.88 | 0.22 | 0.11  | 1.67E-5 |
| 28   | 0.85 | 0.28 | 0.063 | 1.62E-5 |

Table S5. Relaxation fitting parameters from Least-Squares Fitting of  $\chi(f)$  data under zero dc field of 2.

| T (K) | $\chi_t$ | $\chi_s$ | $\alpha$ | $\tau$ (s) |
|-------|----------|----------|----------|------------|
| 9.5   | 1.97     | 0.028    | 0.14     | 0.28       |
| 10    | 1.75     | 0.028    | 0.13     | 0.19       |
| 10.5  | 1.62     | 0.028    | 0.12     | 0.13       |
| 11    | 1.49     | 0.029    | 0.11     | 0.097      |
| 11.5  | 1.34     | 0.035    | 0.077    | 0.070      |
| 12    | 1.31     | 0.030    | 0.10     | 0.056      |
| 12.5  | 1.24     | 0.030    | 0.093    | 0.043      |
| 13    | 1.18     | 0.033    | 0.079    | 0.034      |
| 13.5  | 1.13     | 0.031    | 0.086    | 0.027      |
| 14    | 1.078    | 0.032    | 0.077    | 0.021      |
| 14.5  | 1.035    | 0.033    | 0.073    | 0.017      |
| 15    | 1.00     | 0.033    | 0.072    | 0.014      |
| 15.5  | 0.96     | 0.035    | 0.064    | 0.011      |
| 16    | 0.92     | 0.034    | 0.067    | 0.0088     |
| 16.5  | 0.89     | 0.035    | 0.058    | 0.0071     |
| 17    | 0.86     | 0.034    | 0.066    | 0.0057     |
| 17.5  | 0.84     | 0.033    | 0.066    | 0.0046     |
| 18    | 0.81     | 0.034    | 0.063    | 0.0037     |
| 18.5  | 0.79     | 0.033    | 0.066    | 0.0030     |
| 19    | 0.77     | 0.033    | 0.071    | 0.0024     |
| 19.5  | 0.74     | 0.035    | 0.063    | 0.0019     |
| 20    | 0.73     | 0.033    | 0.075    | 0.0015     |
| 20.5  | 0.71     | 0.033    | 0.074    | 0.0012     |
| 21    | 0.69     | 0.034    | 0.078    | 9.71E-4    |
| 21.5  | 0.67     | 0.036    | 0.078    | 7.71E-4    |
| 22    | 0.66     | 0.034    | 0.087    | 6.071E-4   |
| 22.5  | 0.64     | 0.040    | 0.086    | 4.83E-4    |
| 23    | 0.63     | 0.02     | 0.11     | 3.67E-4    |
| 23.5  | 0.61     | 0.018    | 0.12     | 2.82E-4    |
| 24    | 0.60     | 0.016    | 0.13     | 2.16E-4    |
| 24.5  | 0.59     | 0.016    | 0.12     | 1.69E-4    |
| 25    | 0.59     | 0.012    | 0.15     | 1.27E-4    |
| 25.5  | 0.56     | 0.0064   | 0.16     | 1.00E-4    |
| 26    | 0.56     | 1E-5     | 0.18     | 7.55E-5    |
| 26.5  | 0.54     | 1E-5     | 0.18     | 5.73E-5    |
| 27    | 0.53     | 1E-5     | 0.18     | 4.37E-5    |
| 27.5  | 0.52     | 1E-5     | 0.19     | 3.37E-5    |
| 28    | 0.51     | 1E-5     | 0.19     | 2.61E-5    |
| 28.5  | 0.50     | 1E-5     | 0.20     | 2.04E-5    |

Table S6. Calculated energy levels (K),  $g$  ( $g_x, g_y, g_z$ ) tensors and  $m_J$  values of the lowest Kramers doublets (KDs) of the individual Dy fragments of complexes **1-2**.

| KDs | <b>1-Dy1</b> |        | <b>1-Dy2</b> |        | <b>2</b> |        |
|-----|--------------|--------|--------------|--------|----------|--------|
|     | $E / K$      | $g$    | $E / K$      | $g$    | $E / K$  | $g$    |
| 1   | 0.0          | 0.002  | 0.0          | 0.005  | 0.0      | 0.001  |
|     |              | 0.004  |              | 0.007  |          | 0.002  |
|     |              | 19.644 |              | 19.691 |          | 19.638 |
| 2   | 280.0        | 0.072  | 252.7        | 0.064  | 210.7    | 0.006  |
|     |              | 0.090  |              | 0.083  |          | 0.011  |
|     |              | 16.856 |              | 16.826 |          | 17.445 |
| 3   | 485.7        | 0.461  | 465.4        | 1.850  | 398.8    | 0.148  |
|     |              | 0.948  |              | 2.620  |          | 1.574  |
|     |              | 17.533 |              | 12.998 |          | 16.214 |
| 4   | 542.4        | 1.806  | 537.6        | 0.398  | 421.1    | 1.355  |
|     |              | 4.545  |              | 3.512  |          | 3.487  |
|     |              | 10.857 |              | 14.940 |          | 12.477 |
| 6   | 614.9        | 0.134  | 618.7        | 4.277  | 489.4    | 2.705  |
|     |              | 4.843  |              | 5.344  |          | 5.137  |
|     |              | 11.608 |              | 9.685  |          | 10.426 |
| 7   | 697.4        | 3.751  | 721.6        | 1.325  | 569.0    | 3.075  |
|     |              | 6.095  |              | 1.863  |          | 3.795  |
|     |              | 9.794  |              | 13.751 |          | 9.288  |
| 8   | 759.4        | 0.350  | 825.5        | 0.244  | 627.7    | 0.395  |
|     |              | 0.395  |              | 0.700  |          | 1.256  |
|     |              | 15.409 |              | 17.312 |          | 13.513 |
| 9   | 832.9        | 0.158  | 901.3        | 0.085  | 688.4    | 0.672  |
|     |              | 0.374  |              | 0.221  |          | 0.928  |
|     |              | 18.735 |              | 19.489 |          | 18.030 |

Table S7. The calculated dipole-dipole interaction  $J_{\text{dip}}$ , fitted exchange coupling constant  $J_{\text{exch}}$ , and the total  $J$  ( $J=J_{\text{dip}} + J_{\text{exch}}$ ) between Dy<sup>3+</sup> ions in **1** and **2** (cm<sup>-1</sup>).

|     |                   | <b>1</b> | <b>2</b> |
|-----|-------------------|----------|----------|
| $J$ | $J_{\text{dip}}$  | 4.19     | 4.35     |
|     | $J_{\text{exch}}$ | -1.25    | 1.75     |
|     | $J$               | 2.94     | 6.10     |



Table S8. Some similar examples of lanthanide-based molecular nanomagnets based on {Dy<sub>2</sub>} subunits.

|                                                                                                                                                   | Crystal structure | Dy-Dy/ Å | Dy-O-Dy           | <i>J</i> / cm <sup>-1</sup> |                          |          | Ref       |
|---------------------------------------------------------------------------------------------------------------------------------------------------|-------------------|----------|-------------------|-----------------------------|--------------------------|----------|-----------|
|                                                                                                                                                   |                   |          |                   | <i>J</i> <sub>dip</sub>     | <i>J</i> <sub>exch</sub> | <i>J</i> |           |
| [Dy <sub>2</sub> L <sub>2</sub> Cl <sub>2</sub> (CH <sub>3</sub> OH) <sub>3</sub> ] <sub>n</sub> ·nCH <sub>3</sub> OH                             | 1D                | 3.982    | 114.2°/<br>114.8° | 4.19                        | -1.25                    | 2.94     | This work |
| [Dy(L)Cl(DMF)] <sub>n</sub>                                                                                                                       | 1D                | 3.990    | 115.9°            | 4.35                        | 1.75                     | 6.10     | This work |
| {[Dy <sub>2</sub> L <sub>2</sub> (bpdo) <sub>2</sub> (H <sub>2</sub> O)(CH <sub>3</sub> OH)]·2ClO <sub>4</sub> ·2CH <sub>3</sub> CN} <sub>n</sub> | 3D                | 3.943    | 113.8°/<br>115.0° | 4.52                        | -0.75                    | 3.77     | 12a       |
| {[DyL(bpdo)(H <sub>2</sub> O)]·ClO <sub>4</sub> ·2H <sub>2</sub> O} <sub>n</sub>                                                                  | 2D                | 3.973    | 114.8°            | 4.37                        | -1.5                     | 2.87     | 12a       |
| [DyLCl(CH <sub>3</sub> OH)] <sub>2</sub>                                                                                                          | dinuclear         | 3.900    | 113.7°            | 4.82                        | -1.00                    | 3.82     | 12c       |
| [DyL(HCOO)(CH <sub>3</sub> OH)] <sub>n</sub>                                                                                                      | 1D                | 3.938    | 113.4°            | 4.56                        | 1.75                     | 6.31     | 12c       |
| [Dy <sub>2</sub> (HL) <sub>2</sub> (NO <sub>3</sub> ) <sub>2</sub> (CH <sub>3</sub> CN) <sub>2</sub> ·2CH <sub>3</sub> CN                         | dinuclear         | 3.919    | 114.1°            | 5.22                        | -0.75                    | 4.47     | 18a       |
| [Dy <sub>2</sub> (HL) <sub>2</sub> (NO <sub>3</sub> ) <sub>2</sub> (DMF) <sub>2</sub> ·2H <sub>2</sub> O                                          | dinuclear         | 3.942    | 114.5°            | 5.01                        | -0.03                    | 4.98     | 18a       |
| Dy <sub>2</sub> (HL) <sub>2</sub> (NO <sub>3</sub> ) <sub>2</sub> (DMF) <sub>4</sub>                                                              | dinuclear         | 4.015    | 114.7°            | 4.69                        | 5.00                     | 9.69     | 18a       |
| [Dy <sub>2</sub> (L) <sub>2</sub> (DBM) <sub>2</sub> (DMA) <sub>2</sub> ·2DMA·2CH <sub>3</sub> CN                                                 | dinuclear         | 3.755    | 105.5°            | 6.03                        | -7.33                    | -1.30    | 18b       |
| [Dy <sub>2</sub> (L) <sub>2</sub> (DBM) <sub>2</sub> (DMF) <sub>2</sub> ]                                                                         | dinuclear         | 3.790    | 106.9°            | 5.86                        | -3.40                    | 2.46     | 18b       |
| [Dy <sub>2</sub> (tfo) <sub>4</sub> (L <sup>2</sup> ) <sub>2</sub> (EtOH) <sub>2</sub> ]                                                          | dinuclear         | 3.778    | 107.9°            | 4.46                        | -3.25                    | 1.21     | 18c       |

Abbreviations: H<sub>2</sub>L = N<sup>1</sup>-(5-bromo-2-hydroxybenzylidene) pyrazine-N-oxide-carbohydrazide; H<sub>2</sub>L=N<sup>1</sup>-(2-hydroxybenzylidene)picolinohydrazide; H<sub>3</sub>L = 3-hydroxy-N<sup>1</sup>-(2-hydroxy-3-methoxybenzylidene)picolinohydrazide; H<sub>2</sub>L = 2-(2-hydroxy-3-methoxybenzylideneamino)phenol, HDBM = dibenzoylmethane, DMA = dimethylacetamide; HL<sup>2</sup> = 8-hydroxyquinoline-2-carboxaldehyde-(benzoyl)hydrazine);

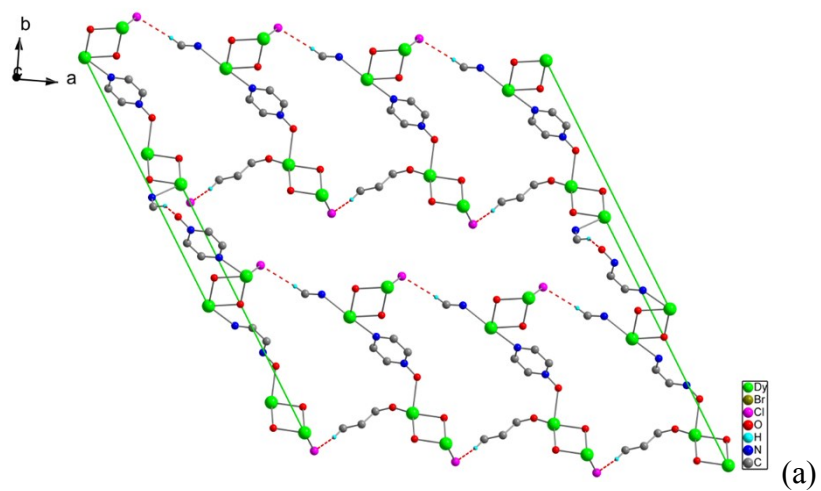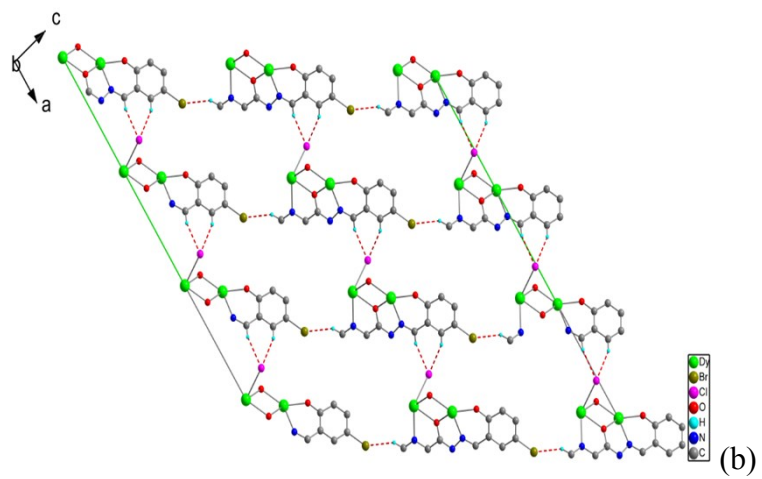

Fig. S1 The hydrogen-bonded 2D layer (a) and the connection of the hydrogen bonds between the layers (b) in **1**.

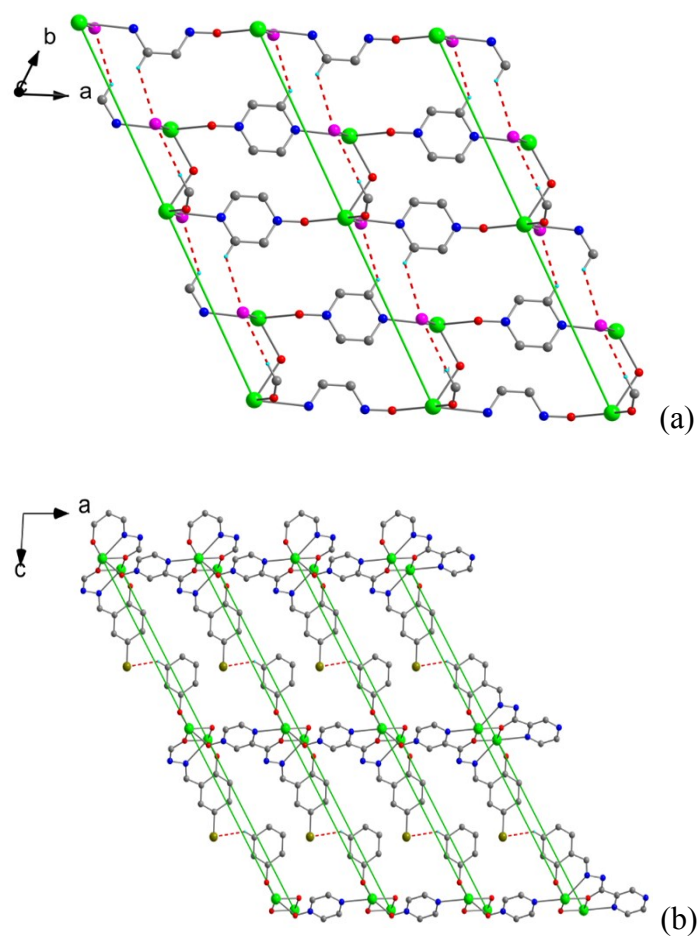

Fig. S2 The hydrogen-bonded 2D layer (a) and the connection of the hydrogen bonds between the layers (b) in **2**.

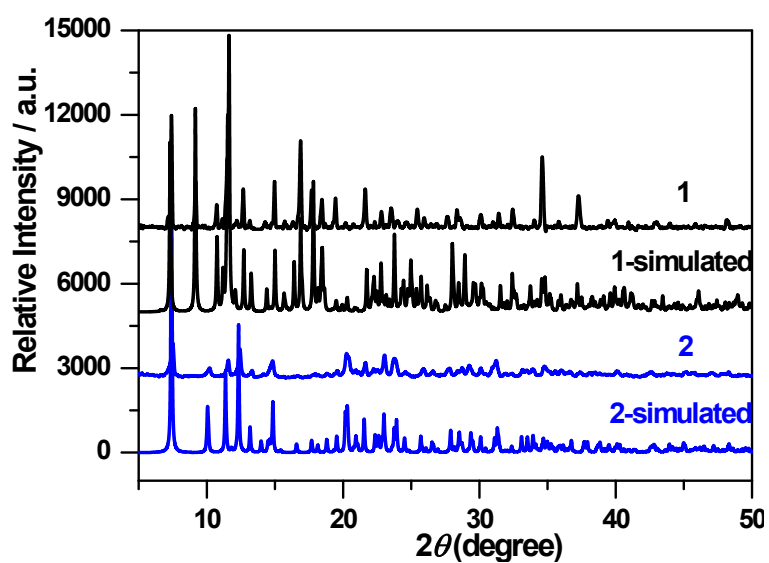

Fig. S3 Powder X-ray diffraction profiles of **1** and **2** together with a simulation from the single crystal data.

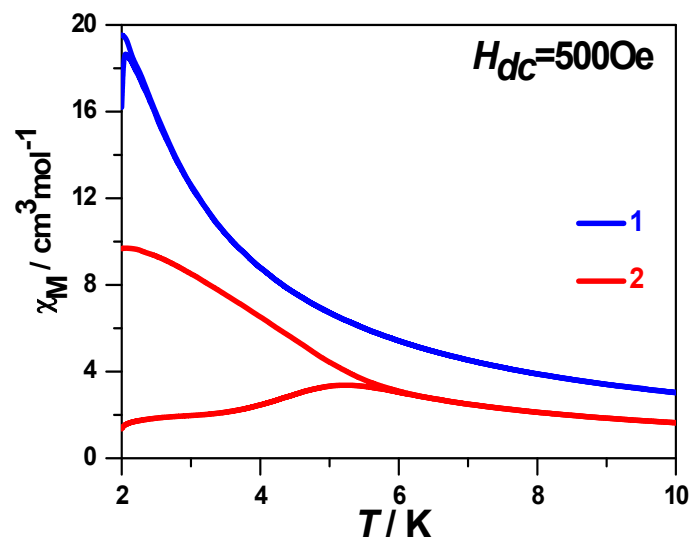

Fig. S4 The zero-field-cooled/field-cooled (ZFC-FC) magnetic susceptibilities under 500 Oe dc field with a sweep rate of 3 K/min were measured for **1** and **2**.

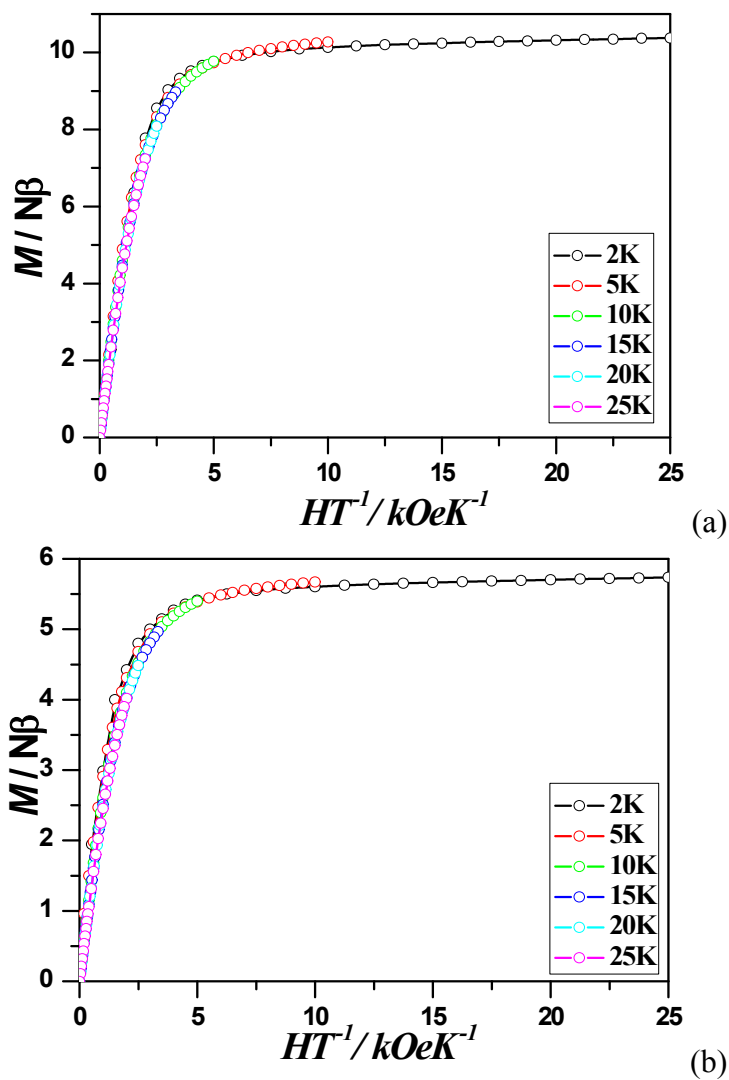

Fig. S5 Plots of M-H for **1** and **2** at 2, 5, 10, 15, 20, and 25 K, respectively

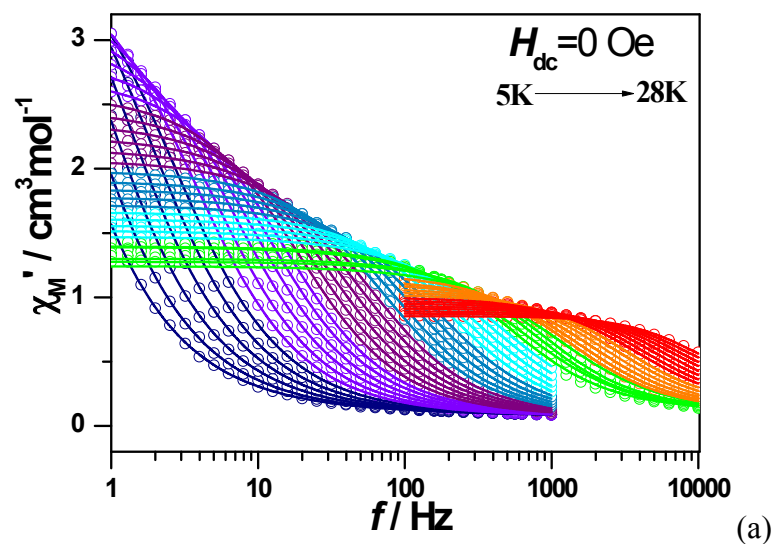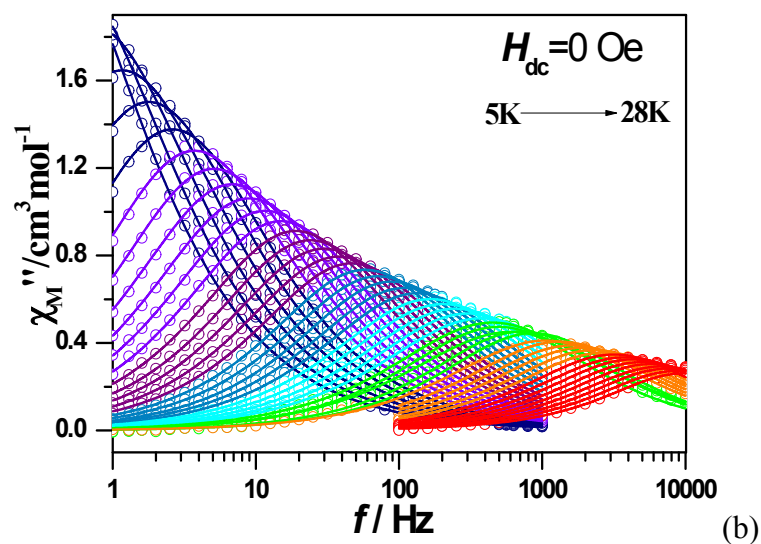

Fig. S6  $Ac-f$  curves measured under 0 kOe  $dc$  fields for **1**. Solid lines were fitted using a generalized Debye relaxation model, simultaneously to  $\chi'(f)$  and  $\chi''(f)$  curves.

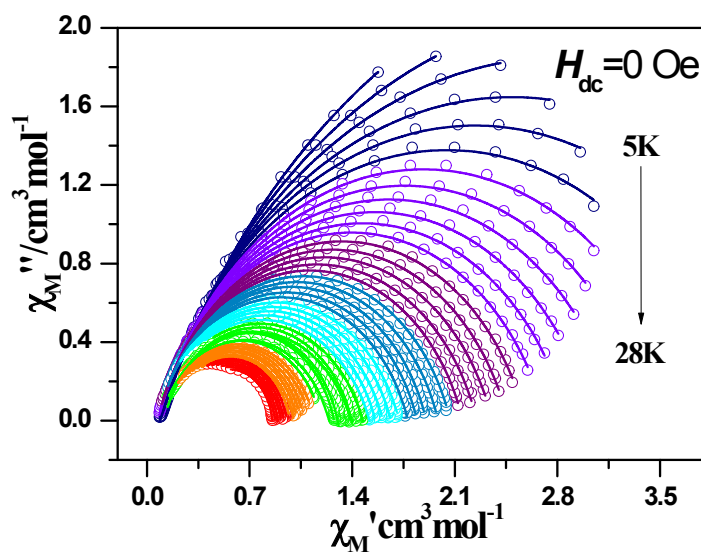

Fig. S7 Cole-Cole plots of **1** under 0 kOe  $dc$  field.

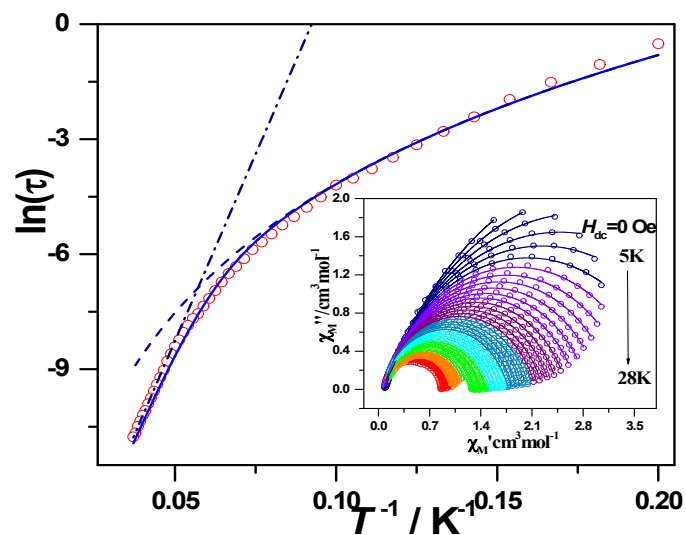

Fig. S8 Plot of  $\ln(\tau)$  versus  $T^{-1}$  for **1** under zero dc field. The blue line represents the fit results with the consideration of Orbach process and Roman processes. Inset: Cole–Cole plots measured at 5.0–28 K under zero dc field, with the best fit to the generalized Debye model.

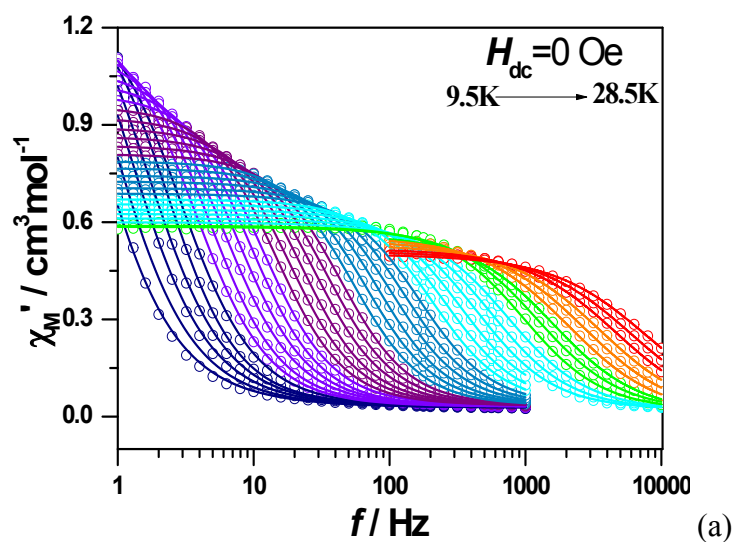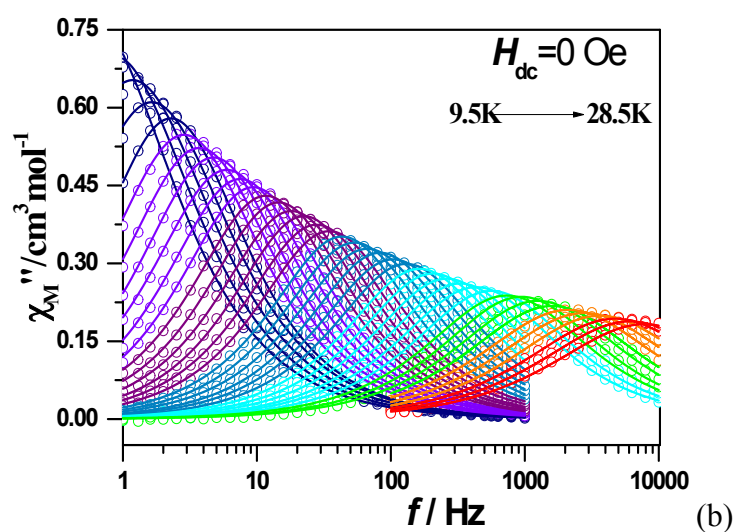

Fig. S9  $Ac$ - $f$  curves measured under 0 kOe  $dc$  fields for **2**. Solid lines were fitted using a generalized Debye relaxation model, simultaneously to  $\chi'(f)$  and  $\chi''(f)$  curves.

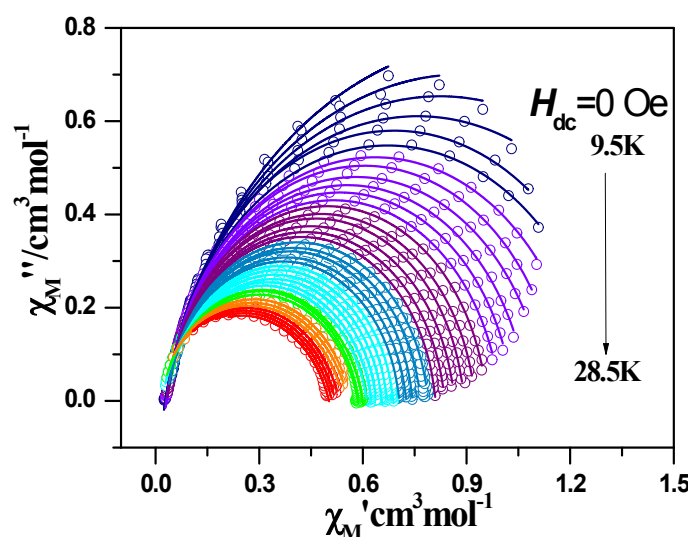

Fig. S10 Cole-Cole plots of **2** under 0 kOe  $dc$  field.

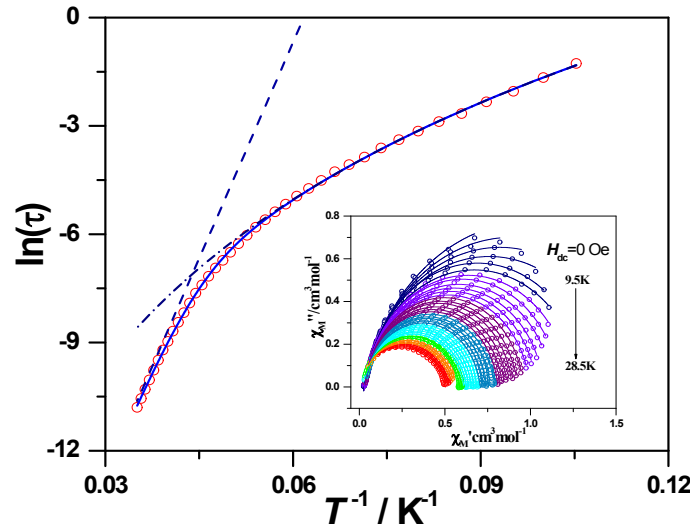

Fig. S11 Plot of  $\ln(\tau)$  versus  $T^{-1}$  for **2** under zero dc field. The blue line represents the fit results with the consideration of Orbach process and Roman processes. Inset: Cole–Cole plots measured at 9.5–28.5 K under zero dc field, with the best fit to the generalized Debye model.



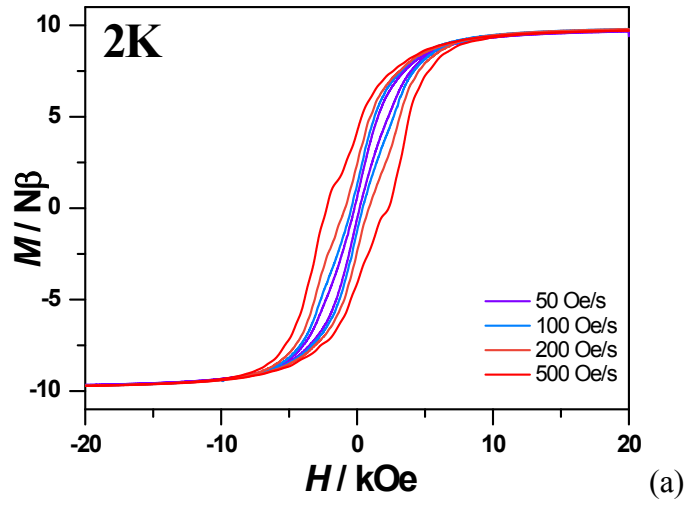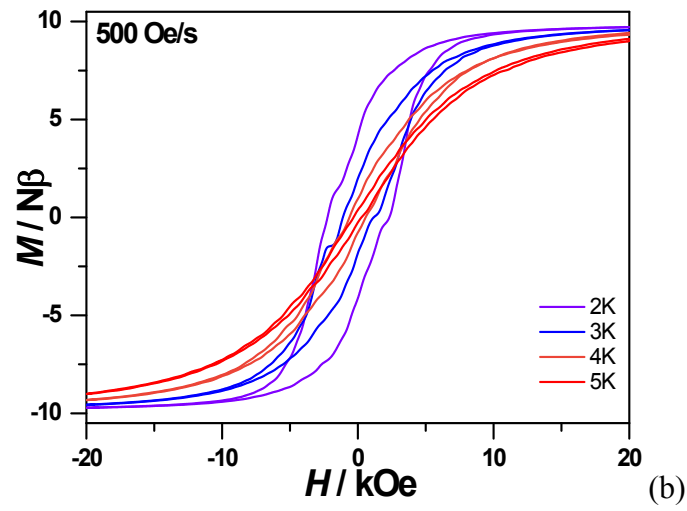

Fig. S12 Hysteresis loop for **1** measured with different sweep rates at 2 K (a) and different temperatures with sweep rates of 500 Oe/s (b).

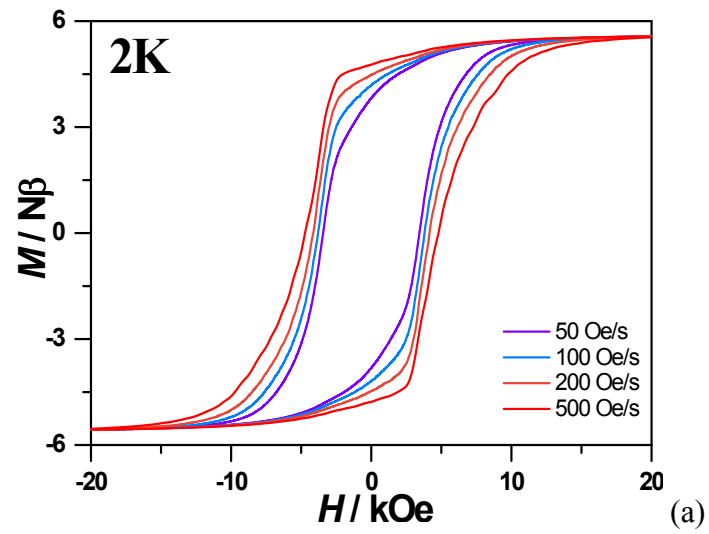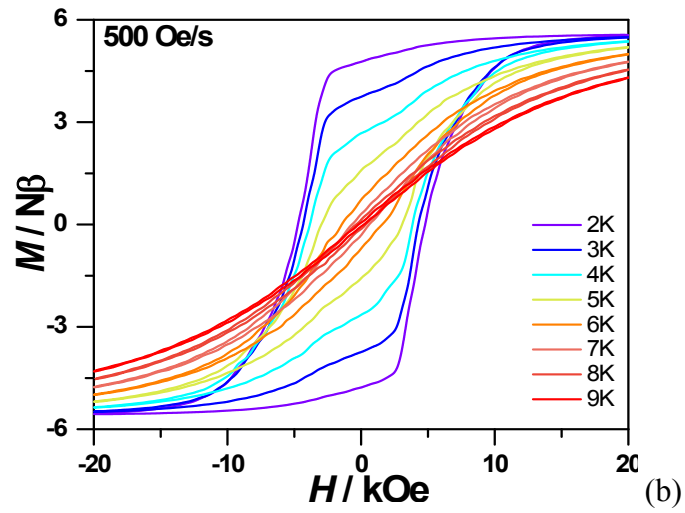

Fig. S13 Hysteresis loop for 2 measured with different sweep rates at 2 K (a) and different temperatures with sweep rates of 500 Oe/s (b).

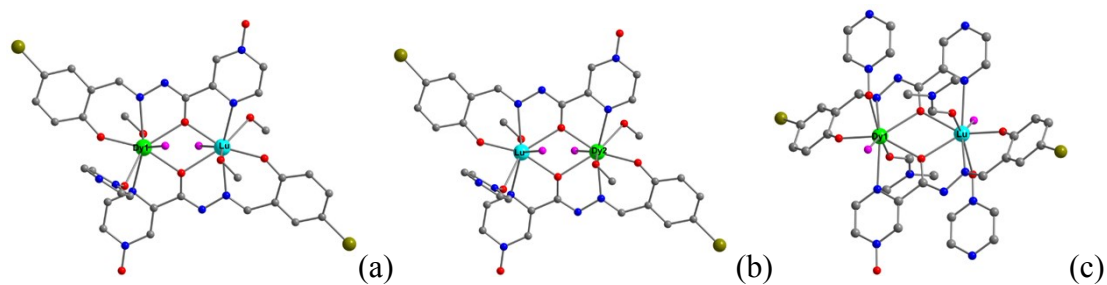

Fig. S14 Calculated model structure for complex complexes **1** (a-b) and **2** (c); H atoms are omitted.

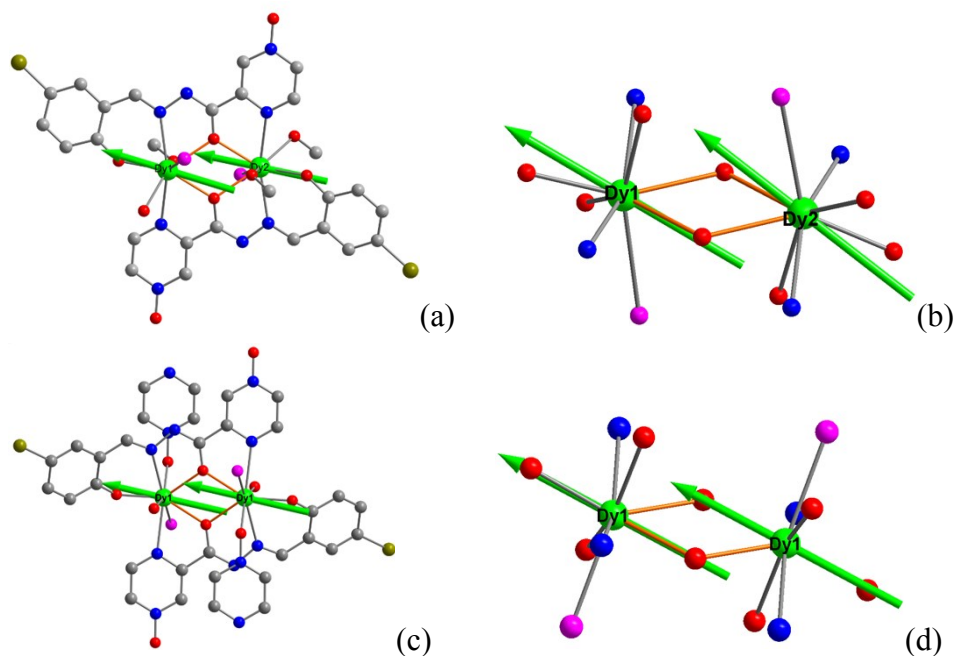

Fig. S15 Orientation of the local main magnetic axes of the ground Kramers doublet on Dy<sup>3+</sup> ion of complexes **1** (a-b) and **2** (c-d).

## Reference

- (1) G. Karlström, R. Lindh, P.-Å. Malmqvist, B. O. Roos, U. Ryde, V. Veryazov, P.-O. Widmark, M. Cossi, B. Schimmelpfennig, P. Neogady and L. Seijo, *Comput. Mater. Sci.*, 2003, **28**, 222.
- (2) M. E. Lines, *J. Chem. Phys.* 1971, **55**, 2977.
- (3) (a) K. C. Mondal, A. Sundt, Y. Lan, G. E. Kostakis, O. Waldmann, L. Ungur, L. F. Chibotaru, C. E. Anson and A. K. Powell, *Angew. Chem., Int. Ed.*, 2012, **51**, 7550; (b) S. K. Langley, D. P. Wielechowski, V. Vieru, N. F. Chilton, B. Moubaraki, B. F. Abrahams, L. F. Chibotaru and K. S. Murray, *Angew. Chem., Int. Ed.*, 2013, **52**, 12014.

- (4) (a) L. F. Chibotaru, L. Ungur and A. Soncini, *Angew. Chem., Int. Ed.*, 2008, **47**, 4126; (b) L. Ungur, W. Van den Heuvel and L. F. Chibotaru, *New. J. Chem.*, 2009, **33**, 1224; (c) L. F. Chibotaru, L. Ungur, C. Aronica, H. Elmoll, G. Pilet and D. Luneau, *J. Am. Chem. Soc.*, 2008, **130**, 12445.
